# Supplementary material
Source: PubMed Central journal article supplement (PMC7593880)

## Supplementary Online Content

Tokez S, Hollestein L, Louwman M, Nijsten T, Wakkee M. Incidence of multiple vs first cutaneous squamous cell carcinoma on a nationwide scale and estimation of future incidences of cutaneous squamous cell carcinoma. *JAMA Dermatol*. Published online October 28, 2020. doi:10.1001/jamadermatol.2020.3677

**eTable 1.** Numbers and European Standardized Rates of First cSCC Stratified by Body Site and Stage in Males and Females

**eTable 2.** Incidence Rates (per 100,000 Person-Years) of cSCC in the Netherlands in Males and Females From 1989 to 2017, Age-Standardized to the European Standard Population 2013 (European Standardized Rate [ESR 2013]), US Standard Population 2000 (United States Standardized Rate [USSR]), European Standard Population 1976 (European Standardized Rate [ESR 1976]), World Standard Population 1968 (World Standardized Rate [WSR]) and World (WHO 2000-2025) Standard Population (World Standardized Rate [WSR 2000-2025])

**eFigure 1.** Three Year Moving ESR Averages for cSCC per Body Site in Males (A) and Females (B)

**eFigure 2.** Body Site Specific Distribution of First cSCCs (A) and Subsequent cSCCs (B)

This supplementary material has been provided by the authors to give readers additional information about their work.

**eTable 1.** Numbers and European Standardized Rates of First cSCC Stratified by Body Site and Stage in Males and Females

|                  | Males  |           |           |           |           |           |           |      |       | Females |           |           |           |           |           |           |      |      |
|------------------|--------|-----------|-----------|-----------|-----------|-----------|-----------|------|-------|---------|-----------|-----------|-----------|-----------|-----------|-----------|------|------|
|                  |        |           |           | ESR       |           |           |           |      |       |         |           |           | ESR       |           |           |           |      |      |
|                  | N      | 1989-1993 | 1994-1998 | 1999-2003 | 2004-2008 | 2009-2013 | 2014-2015 | 2016 | 2017  | N       | 1989-1993 | 1994-1998 | 1999-2003 | 2004-2008 | 2009-2013 | 2014-2015 | 2016 | 2017 |
| <i>Overall</i>   | 84,572 | 40.1      | 43.7      | 45.8      | 58.0      | 75.1      | 79.6      | 97.1 | 107.6 | 61,046  | 14.5      | 17.3      | 19.9      | 27.6      | 39.7      | 44.1      | 59.7 | 68.7 |
| <i>Body site</i> |        |           |           |           |           |           |           |      |       |         |           |           |           |           |           |           |      |      |
| Lips             | 2580   | 2.1       | 1.8       | 1.4       | 1.5       | 1.6       | 1.6       | 2.1  | 1.6   | 1728    | 0.5       | 0.6       | 0.6       | 0.7       | 1.1       | 1.2       | 1.8  | 1.5  |
| Eyelid           | 898    | 0.7       | 0.6       | 0.7       | 0.7       | 0.6       | 0.5       | 0.6  | 0.6   | 857     | 0.3       | 0.2       | 0.4       | 0.4       | 0.5       | 0.5       | 0.7  | 0.6  |
| Ear              | 14,941 | 9.9       | 10.3      | 9.9       | 11.2      | 13.6      | 13.1      | 14.1 | 10.9  | 1077    | 0.4       | 0.4       | 0.4       | 0.5       | 0.6       | 0.7       | 1.0  | 0.7  |
| Face             | 30,473 | 14.1      | 15.9      | 17.2      | 21.2      | 27.5      | 28.5      | 34.2 | 33.0  | 27,357  | 7.6       | 8.9       | 9.8       | 13.0      | 17.7      | 19.0      | 23.6 | 21.7 |
| Scalp/neck       | 14,889 | 5.2       | 6.4       | 7.5       | 11.1      | 15.1      | 18.2      | 18.9 | 25.4  | 3269    | 0.7       | 0.8       | 0.9       | 1.3       | 1.9       | 2.4       | 3.6  | 5.9  |
| Trunk            | 4814   | 1.1       | 1.5       | 1.9       | 2.8       | 4.1       | 4.4       | 6.5  | 6.7   | 5636    | 0.8       | 1.2       | 1.4       | 2.4       | 4.0       | 4.7       | 7.0  | 7.7  |
| Arms             | 10,982 | 5.6       | 5.8       | 5.4       | 7.0       | 9.0       | 9.4       | 13.0 | 13.9  | 10,998  | 2.6       | 3.0       | 3.5       | 5.0       | 7.3       | 7.8       | 10.7 | 13.0 |
| Legs             | 3458   | 1.0       | 1.1       | 1.4       | 1.9       | 3.1       | 3.4       | 4.9  | 5.7   | 8938    | 1.3       | 2.0       | 2.7       | 4.0       | 6.3       | 7.5       | 9.7  | 10.6 |
| Unknown          | 1537   | 0.4       | 0.3       | 0.5       | 0.8       | 0.5       | 0.6       | 2.7  | 9.9   | 1186    | 0.2       | 0.2       | 0.2       | 0.2       | 0.2       | 0.3       | 1.7  | 6.9  |
| <i>Stage</i>     |        |           |           |           |           |           |           |      |       |         |           |           |           |           |           |           |      |      |
| I                | 56,450 | 26.3      | 28.8      | 32.1      | 45.4      | 62.7      | 68.0      | 14.8 | 2.1   | 40,821  | 9.4       | 11.7      | 14.5      | 22.7      | 34.3      | 39.1      | 8.8  | 1.4  |
| II               | 5892   | 3.8       | 3.9       | 4.4       | 5.7       | 6.4       | 6.8       | 1.6  | 0.4   | 3446    | 1.3       | 1.2       | 1.6       | 2.0       | 2.3       | 2.6       | 0.7  | 0.1  |
| III              | 986    | 0.7       | 0.8       | 0.7       | 0.7       | 0.8       | 1.2       | 0.6  | 0.1   | 490     | 0.2       | 0.2       | 0.3       | 0.2       | 0.2       | 0.5       | 0.2  | 0.1  |
| IV               | 158    | 0.0       | 0.1       | 0.1       | 0.0       | 0.2       | 0.5       | 0.1  | 0.1   | 104     | 0.0       | 0.0       | 0.0       | 0.0       | 0.1       | 0.1       | 0.1  | 0.0  |
| Unknown          | 21,086 | 9.3       | 10.1      | 8.6       | 6.2       | 5.1       | 3.1       | 80.0 | 104.9 | 16,185  | 3.5       | 4.0       | 3.5       | 2.7       | 2.8       | 1.8       | 50.0 | 67.2 |

Abbreviations: cSCC, cutaneous squamous cell carcinoma; ESR, European Standardized Rate per 100,000 person-years; N, number of cases.

**eTable 2.** Incidence Rates (per 100,000 Person-Years) of cSCC in the Netherlands in Males and Females From 1989 to 2017, Age-Standardized to the European Standard Population 2013 (European Standardized Rate [ESR 2013]), US Standard Population 2000 (United States Standardized Rate [USSR]), European Standard Population 1976 (European Standardized Rate [ESR 1976]), World Standard Population 1968 (World Standardized Rate [WSR]) and World (WHO 2000-2025) Standard Population (World Standardized Rate [WSR 2000-2025])

| Year of diagnosis | Gender | ESR 2013 | USSR | ESR 1976 | WSR 1968 | WSR 2000-2025 |
|-------------------|--------|----------|------|----------|----------|---------------|
| 1989              | Male   | 40.0     | 26.5 | 22.3     | 14.1     | 16.9          |
| 1990              | Male   | 40.4     | 26.5 | 22.2     | 13.9     | 16.7          |
| 1991              | Male   | 38.6     | 25.6 | 21.4     | 13.4     | 16.1          |
| 1992              | Male   | 40.6     | 27.1 | 22.8     | 14.3     | 17.2          |
| 1993              | Male   | 40.9     | 27.0 | 22.4     | 13.8     | 16.8          |
| 1994              | Male   | 43.1     | 28.8 | 24.2     | 15.1     | 18.1          |
| 1995              | Male   | 43.3     | 28.5 | 23.7     | 14.8     | 17.9          |
| 1996              | Male   | 44.6     | 30.0 | 25.0     | 15.5     | 18.8          |
| 1997              | Male   | 44.4     | 29.4 | 24.6     | 15.3     | 18.4          |
| 1998              | Male   | 43.1     | 28.5 | 23.6     | 14.7     | 17.8          |
| 1999              | Male   | 45.5     | 30.2 | 25.0     | 15.5     | 18.8          |
| 2000              | Male   | 45.4     | 30.3 | 24.5     | 15.0     | 18.5          |
| 2001              | Male   | 45.1     | 30.1 | 24.8     | 15.2     | 18.6          |
| 2002              | Male   | 46.6     | 30.7 | 25.0     | 15.4     | 18.8          |
| 2003              | Male   | 46.6     | 30.4 | 24.9     | 15.3     | 18.7          |
| 2004              | Male   | 50.7     | 33.8 | 27.7     | 17.1     | 20.9          |
| 2005              | Male   | 56.4     | 37.3 | 30.2     | 18.4     | 22.6          |
| 2006              | Male   | 56.8     | 37.8 | 30.7     | 18.9     | 23.1          |
| 2007              | Male   | 63.9     | 42.1 | 34.1     | 20.8     | 25.6          |
| 2008              | Male   | 62.4     | 41.2 | 33.2     | 20.3     | 25.1          |
| 2009              | Male   | 67.2     | 44.4 | 35.4     | 21.4     | 26.7          |
| 2010              | Male   | 74.0     | 48.3 | 38.9     | 23.8     | 29.3          |
| 2011              | Male   | 80.4     | 52.9 | 42.6     | 26.0     | 32.1          |
| 2012              | Male   | 77.4     | 51.4 | 41.2     | 25.0     | 30.9          |
| 2013              | Male   | 76.7     | 51.0 | 40.5     | 24.4     | 30.5          |
| 2014              | Male   | 80.5     | 53.2 | 42.1     | 25.3     | 31.6          |
| 2015              | Male   | 78.8     | 52.0 | 41.1     | 24.6     | 30.9          |
| 2016              | Male   | 97.1     | 64.2 | 51.1     | 30.9     | 38.5          |
| 2017              | Male   | 107.6    | 71.4 | 57.2     | 24.6     | 43.0          |
| 1989              | Female | 13.9     | 9.3  | 7.8      | 5.0      | 5.9           |
| 1990              | Female | 13.9     | 9.3  | 7.6      | 4.8      | 5.8           |
| 1991              | Female | 14.3     | 9.6  | 8.1      | 5.1      | 6.1           |
| 1992              | Female | 15.5     | 10.4 | 8.7      | 5.5      | 6.6           |
| 1993              | Female | 14.8     | 10.0 | 8.3      | 5.3      | 6.3           |
| 1994              | Female | 17.0     | 11.5 | 9.6      | 6.1      | 7.3           |
| 1995              | Female | 16.7     | 11.3 | 9.7      | 6.2      | 7.4           |
| 1996              | Female | 18.4     | 12.4 | 10.3     | 6.5      | 7.8           |
| 1997              | Female | 17.3     | 11.7 | 9.9      | 6.3      | 7.5           |
| 1998              | Female | 16.9     | 11.5 | 9.8      | 6.3      | 7.5           |
| 1999              | Female | 18.8     | 12.8 | 10.7     | 6.8      | 8.1           |
| 2000              | Female | 18.8     | 12.8 | 10.8     | 6.8      | 8.2           |
| 2001              | Female | 20.5     | 13.8 | 11.7     | 7.4      | 8.8           |

|      |        |      |      |      |      |      |
|------|--------|------|------|------|------|------|
| 2002 | Female | 19.4 | 13.1 | 11.0 | 7.0  | 8.3  |
| 2003 | Female | 21.9 | 14.8 | 12.5 | 7.9  | 9.5  |
| 2004 | Female | 23.1 | 15.6 | 13.2 | 8.3  | 10.0 |
| 2005 | Female | 25.7 | 17.3 | 14.6 | 9.2  | 11.0 |
| 2006 | Female | 28.4 | 19.2 | 16.3 | 10.4 | 12.4 |
| 2007 | Female | 29.1 | 19.6 | 16.7 | 10.6 | 12.6 |
| 2008 | Female | 31.8 | 21.4 | 18.2 | 11.6 | 13.7 |
| 2009 | Female | 33.7 | 22.7 | 19.4 | 12.4 | 14.7 |
| 2010 | Female | 38.2 | 25.7 | 22.0 | 14.0 | 16.6 |
| 2011 | Female | 43.0 | 29.1 | 24.8 | 15.8 | 18.8 |
| 2012 | Female | 41.3 | 27.7 | 23.6 | 15.0 | 17.8 |
| 2013 | Female | 42.1 | 28.2 | 23.7 | 15.0 | 17.9 |
| 2014 | Female | 43.9 | 29.5 | 24.9 | 15.7 | 18.8 |
| 2015 | Female | 44.3 | 29.7 | 24.9 | 15.6 | 18.8 |
| 2016 | Female | 59.7 | 40.3 | 33.9 | 21.3 | 25.7 |
| 2017 | Female | 68.7 | 46.4 | 39.5 | 25.0 | 29.9 |

**eFigure 1.** Three Year Moving ESR Averages for cSCC per Body Site in Males (A) and Females (B)

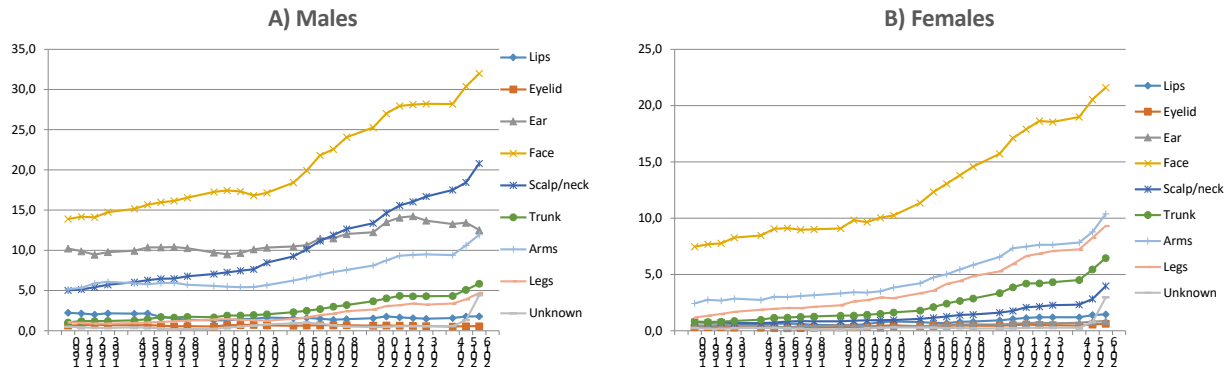

**eFigure 2.** Body Site Specific Distribution of First cSCCs (A) and Subsequent cSCCs (B)

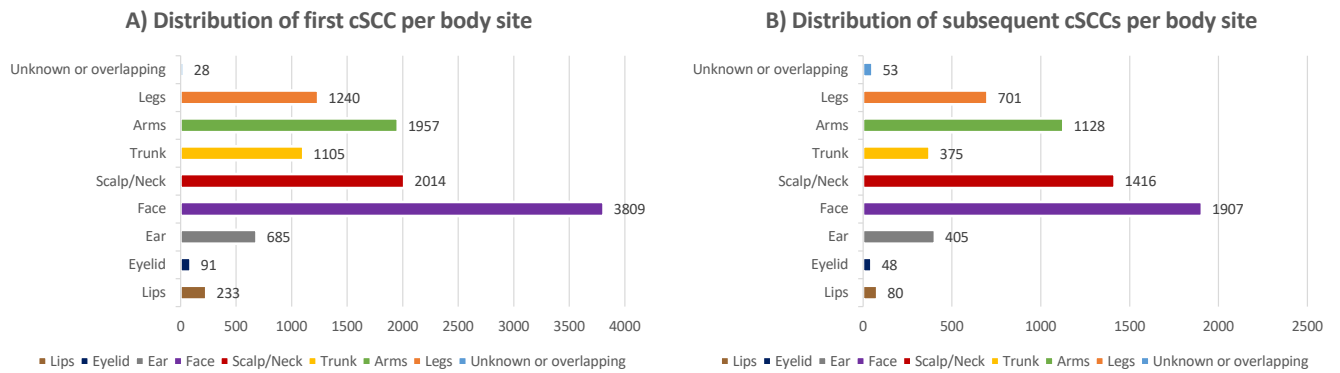

Supplement: jamadermatol-e203677-s001.pdf [file jamadermatol-e203677-s001.pdf]
